# Supplementary material for: FAM122A Is Required for Mesendodermal and Cardiac Differentiation of Embryonic Stem Cells
Source: PubMed Central journal article supplement — Stem Cells. 2023 Jan 30;41(4):354–67. doi: 10.1093/stmcls/sxad008 (PMC10498146; doi:10.1093/stmcls/sxad008), 2023-01-30
Supplement: sxad008_suppl_supplementary_figures.pdf [file sxad008_suppl_supplementary_figures.pdf]

## Supplementary Materials for FAM122A is required for mesendodermal and cardiac differentiation of embryonic stem cells

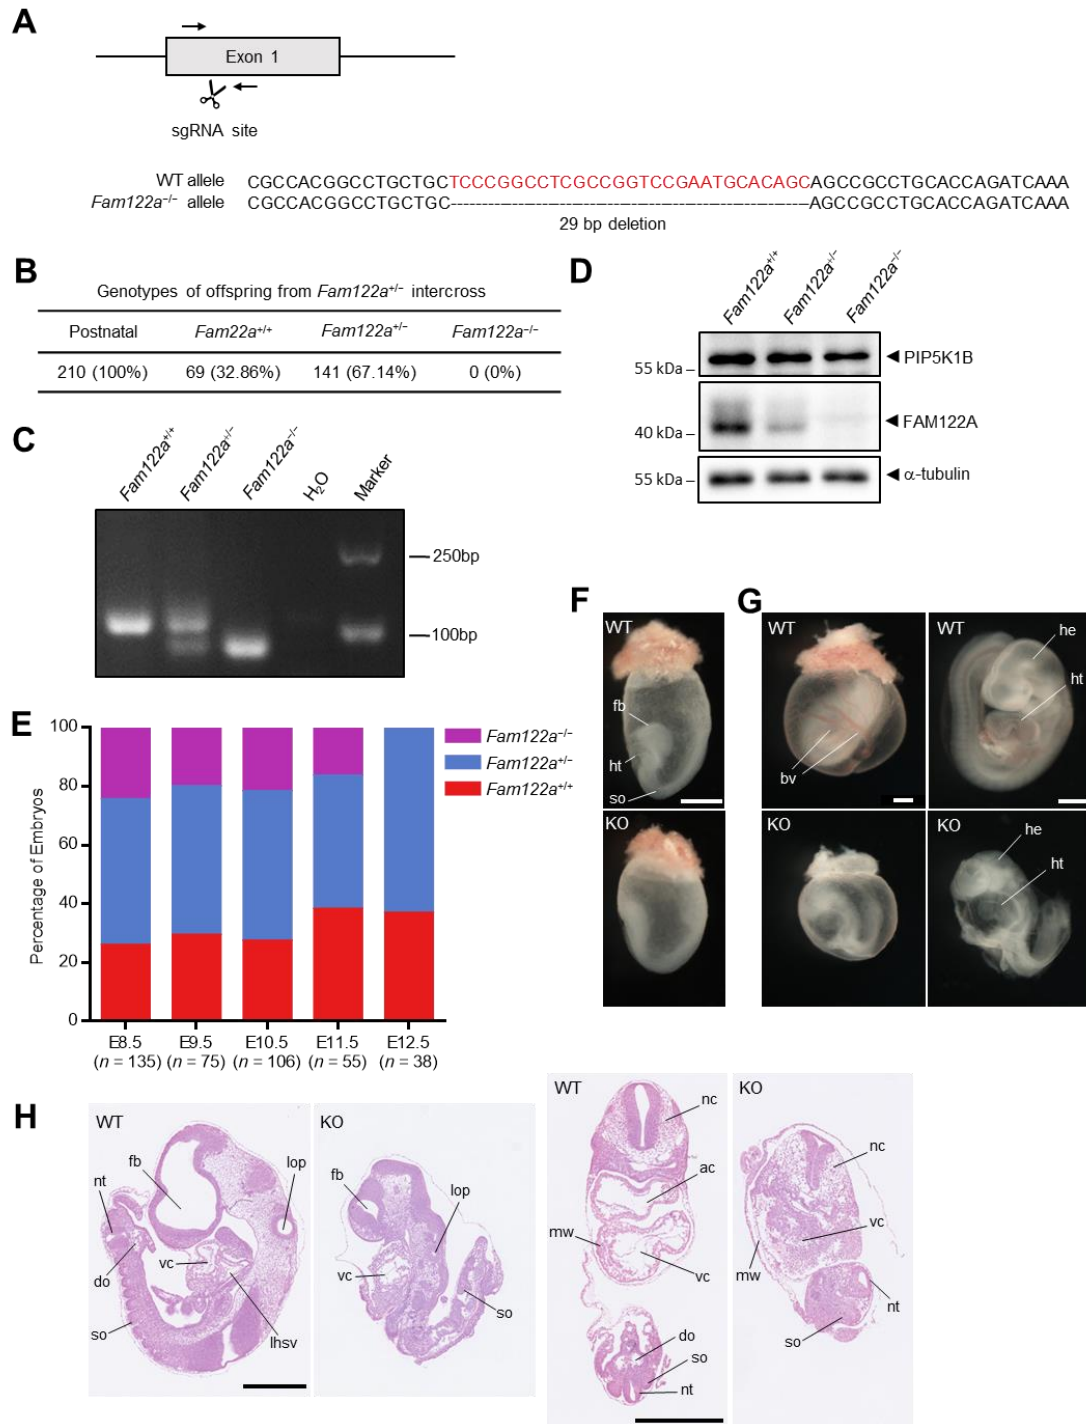

### Supplementary Figure S1. Embryonic lethality and severe defects of cardiovascular development occurred in *Fam122a* knockout mice.

(A) Schematic of *Fam122a* knockout mice. The site of sgRNA is indicated in the exon. PCR primers used for genotyping are shown as horizontal arrows. *Fam122a* KO allele is 29bp deleted compared to WT allele, causing frameshift mutation.

- (B) Genotypes of offspring from *Fam122a*<sup>+/-</sup> intercross.
  - (C) Gel image of genotyping PCR results.
  - (D) Western blot analysis of indicated proteins from E9.5 embryos.
  - (E) Percentages of embryos in the indicated day.
  - (F) Lateral view of E8.5 embryos. Somite (so), forebrain (fb) and heart (ht) are indicated in WT embryo.
  - (G) Lateral view of E9.5 embryos with or without yolk sac. Bv, blood vessel; he, head; ht, heart.
  - (H) Haematoxylin and eosin (H&E)-stained sagittal and transverse sections of E9.5 embryos. Fb, forebrain; lop, left otic pit; nt, neural tube; do, dorsal aorta; vc, ventricular chamber; lhsv, left horn of sinus venosus; so, somite; nc, neural crest; ac, atrial chamber; mw, myocardial wall.
- Scale bars, 500  $\mu$ m (F-H).

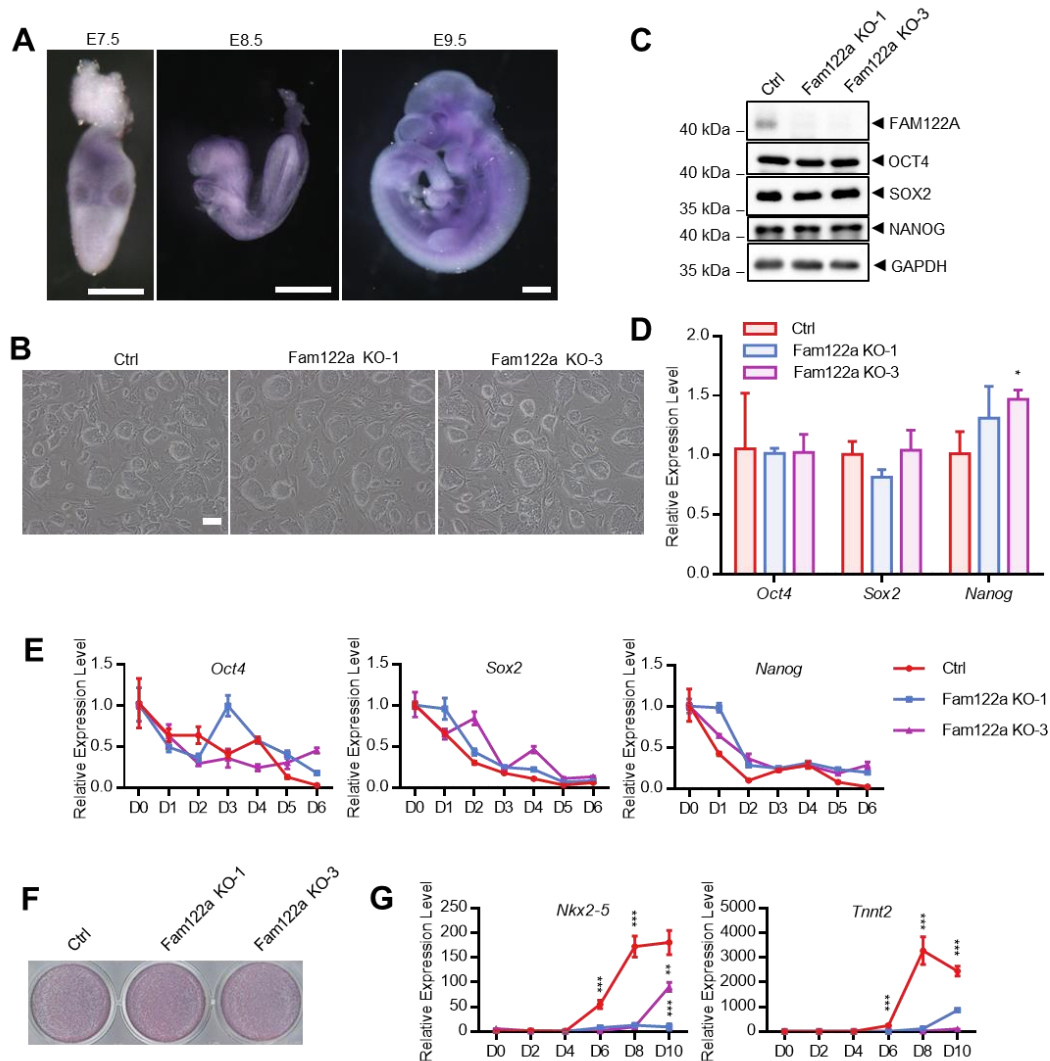

### Supplementary Figure S2. Pluripotency not affected in *Fam122a* knockout mESCs.

(A) Whole-mount *in situ* hybridization of *Fam122a* in mouse embryos at indicated time. Scale bars, 500 $\mu$ m.

(B) The colony morphologies of control and *Fam122a* KO mESCs. Scale bar, 100  $\mu$ m.

(C) Western blot analysis of pluripotency markers in indicated mESCs.

(D) qRT-PCR analysis of pluripotency marker genes in control and *Fam122a* KO mESCs.

(E) Time course analysis of *Oct4*, *Sox2* and *Nanog* expression during mESC differentiation.

(F) Images of alkaline phosphatase-stained colonies in control and *Fam122a* KO mESCs.

(G) Time course analysis of *Nkx2-5* and *Tnnt2* expression during mESC differentiation.

In (D) and (G), data represent means  $\pm$  s.d. from  $n = 3$  independent experiments, and  $P$  values were calculated by two-tailed unpaired  $t$ -test (\*  $P < 0.05$ , \*\*  $P < 0.01$ , \*\*\*  $P < 0.001$ ).

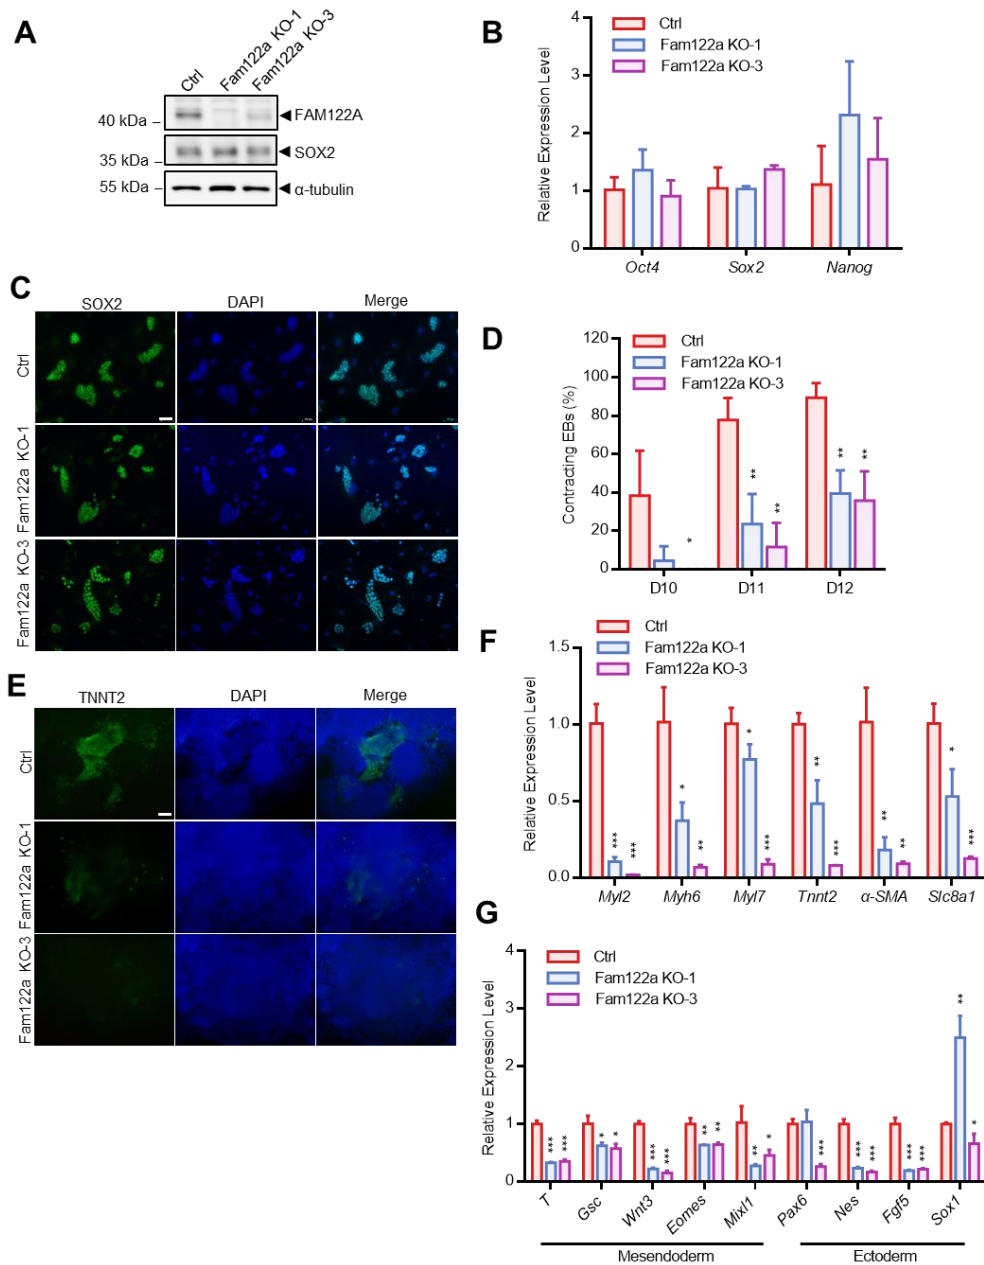

### Supplementary Figure S3. Cardiac differentiation defect in *Fam122a* knockout TC1 mESCs.

- (A) Western blot analysis of FAM122A knockout effect in TC1 mESCs.
- (B) qRT-PCR analysis of pluripotency marker genes in Fam122a KO TC1 mESCs.
- (C) SOX2 immunostaining of control and Fam122a KO mESCs. Scale bar, 100  $\mu$ m.
- (D) Percentages of contracting EBs from D10 to D12 in differentiated TC1 mESCs.
- (E) TNNT2 immunostaining on D12 in differentiated TC1 mESCs. Scale bar, 100  $\mu$ m.
- (F) Expression analysis of cardiomyocyte marker genes on D12 of TC1 mESCs.
- (G) qRT-PCR analysis of three germ layer marker genes on D4 of TC1 EBs.
- In (B), (D), (F) and (G), data represent means  $\pm$  s.d. from  $n = 3$  independent experiments, and  $P$  values were calculated by two-tailed unpaired  $t$ -test (\*  $P < 0.05$ , \*\*  $P < 0.01$ , \*\*\*  $P < 0.001$ ).

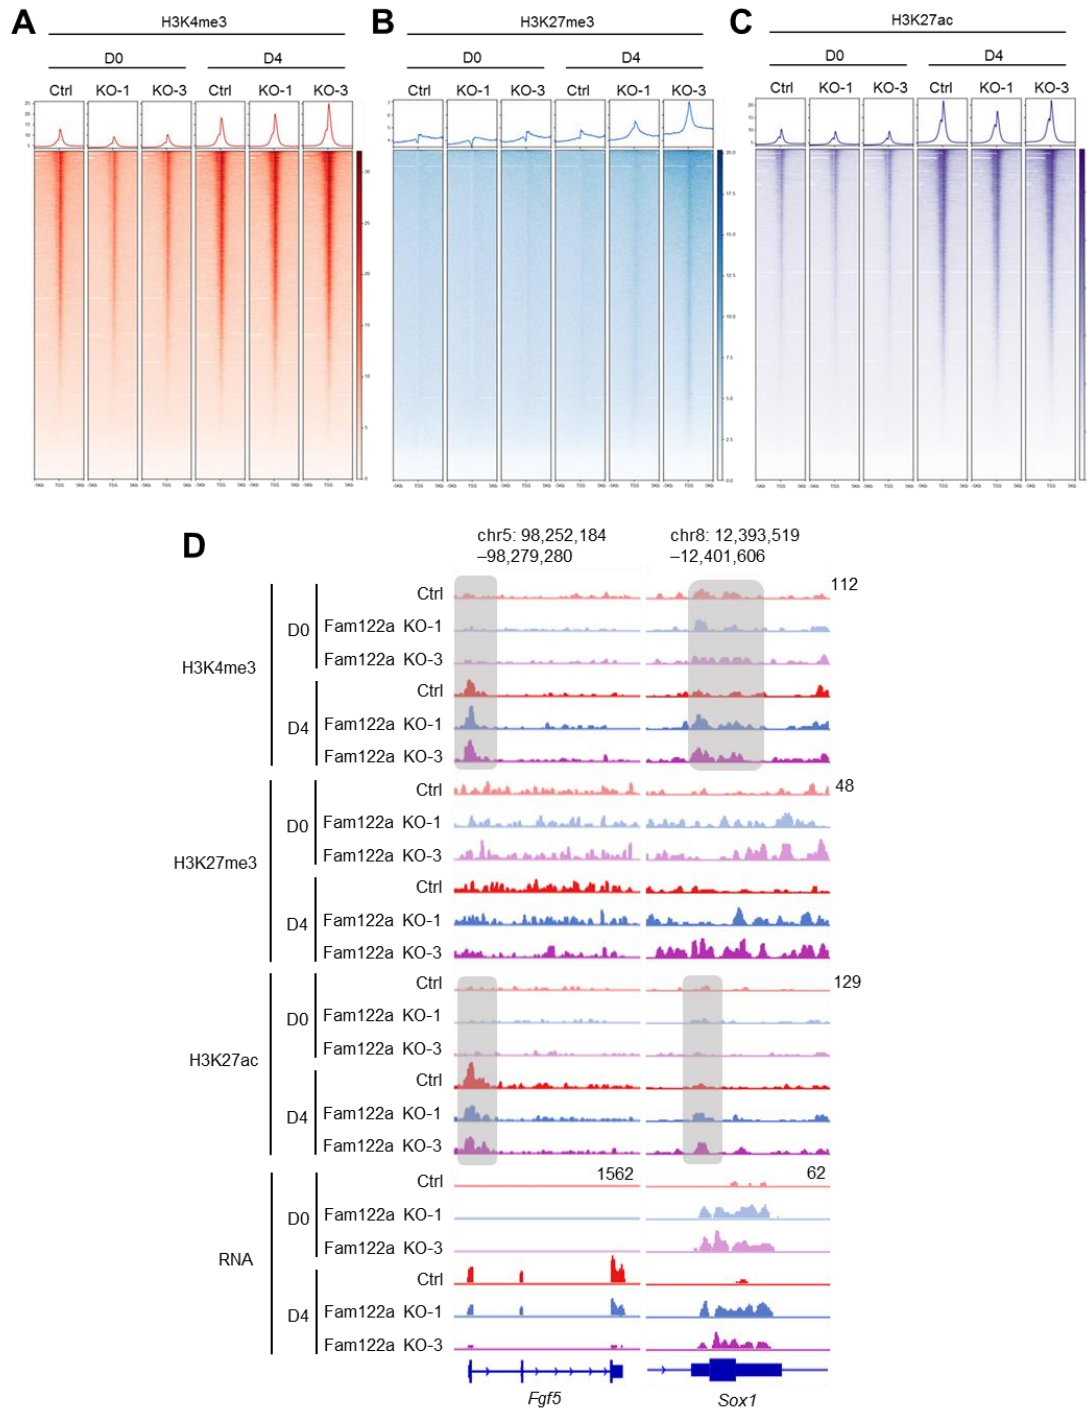

**Supplementary Figure S4. Histone modification regulated in *Fam122a* knockout mESCs.**

(A-C) Heatmaps showing H3K4me3 (A), H3K27me3 (B) and H3K27ac (C) enrichment in D0 and D4 control and *Fam122a* knockout mESCs.

(D) Genome browser views of H3K4me3, H3K27me3 and H3K27ac ChIP-seq signals as well as RNA expression in D0 and D4 control and *Fam122a* knockout mESCs at ectoderm genes *Fgf5* and *Sox1*.

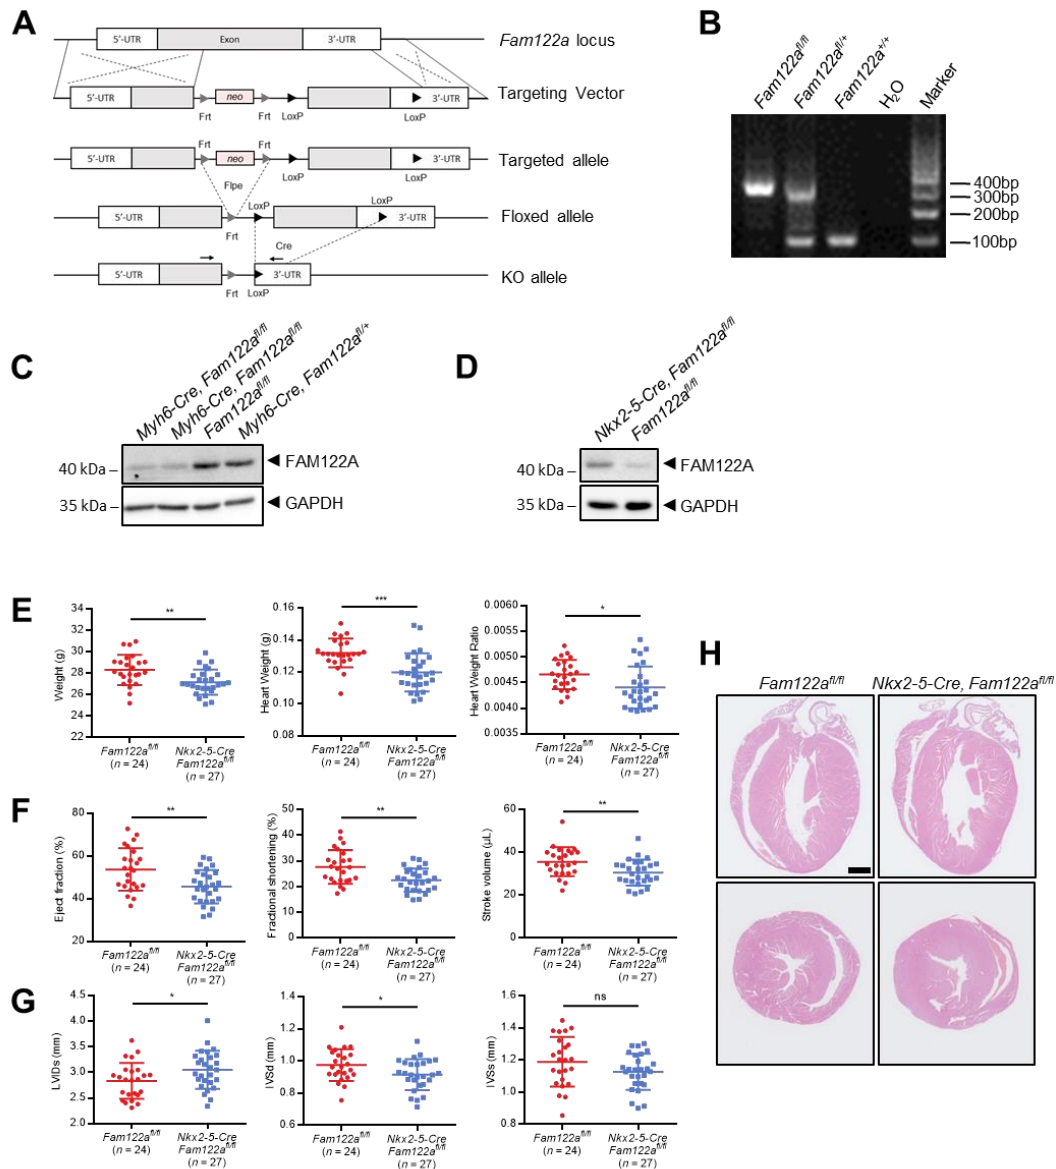

### Supplementary Figure S5. Cardiac function attenuated in *Nkx2-5-Cre Fam122a* CKO mice.

(A) Schematic of *Fam122a* conditional knockout mice.

(B) Gel image of *Fam122a* loxp genotyping PCR results.

(C and D) Western blot analysis of FAM122A expression in heart tissues from *Myh6-Cre Fam122a* CKO mice (C) and *Nkx2-5 CreFam122a* CKO mice (D).

(E) Body weight, heart weight and heart weight ratio analyses in control ( $n = 24$ ) and *Fam122a* CKO ( $n = 27$ ) mice.

(F) Echocardiography analyses for the EF, FS and SV in control ( $n = 24$ ) and *Fam122a* CKO ( $n = 27$ ) mice.

(G) Echocardiography analyses for the LVID and IVS in diastole or systole in control ( $n = 24$ ) and *Fam122a* CKO ( $n = 27$ ) mice.

(H) H&E-stained sagittal or transverse sections of heart in control and *Fam122a* CKO mice. Scale bar, 1 mm.

In (E), (F) and (G), data represent means  $\pm$  s.d. and  $P$  values were calculated by two-tailed unpaired  $t$ -test (\*  $P < 0.05$ , \*\*  $P < 0.01$ , \*\*\*  $P < 0.001$ , ns, no significance).
